# Supplementary material
Source: Springer Nature journal article supplement (https://www.springermedizin.de/resource/supplementary/12889_2004_226_MOESM1_ESM.pdf/9500702)

**Figure 1: Passive interpreter model**

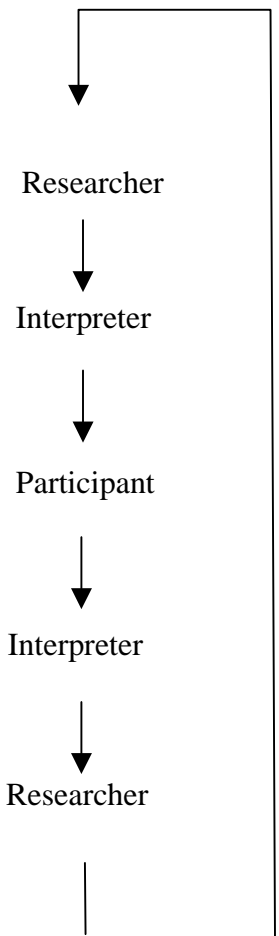

Supplement: MOESM1 [file 9500702]
